# Supplementary material
Source: bioRxiv or medRxiv preprint supplement (https://www.biorxiv.org/highwire/filestream/80722/field_highwire_adjunct_files/0/263434-1.pdf)
Supplement: Supplementary file [file 263434-1.pdf]

**Cell-specific discrimination of desmosterol and desmosterol mimetics confers selective regulation of LXR and SREBP pathways in macrophages**

**Supplementary Figure 1. *Effect of DHCR24-ASO administration in mouse liver and macrophage.*** **A.** For in vivo studies, mice received biweekly intraperitoneal (i.p.) injections of ASO for 3 weeks prior to sacrifice. **B.** Treatment of mice with 2 separate DHCR24 specific ASOs (ASO 805, ASO 873) and scramble control ASO (SCR ASO) was well tolerated throughout the course of the study without body weight changes among groups (n = 6 for all groups). **C.** Gene expression changes in Dhcr24, Abca1, and Abcg1 in liver and macrophage of animals treated with DHCR24 ASO. **D.** Desmosterol concentrations in plasma, liver and macrophage as measured by LC-MS after DHCR24 ASO (\* p < 0.005).

**Supplementary Figure 2. *Purification of Kupffer cells.*** Successive gating strategy for isolation of Kupffer cells from labeled non-parenchymal cells using cell sorting. Kupffer cells were defined at CD45+, F4/80 high, CD11b intermediate, CD146-, single particles, FixVia NIR- (not shown), and Tim4+.

**A**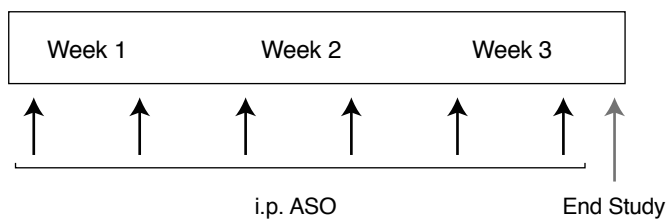**B**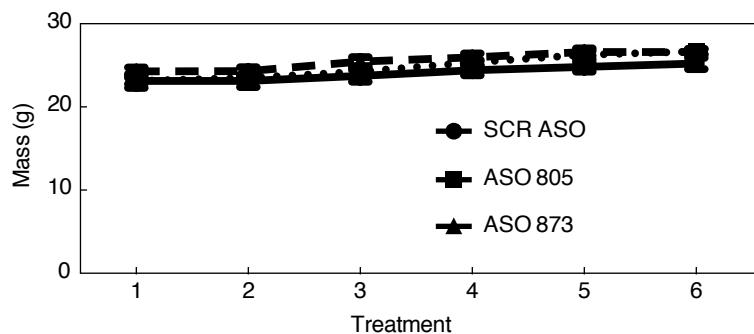**C**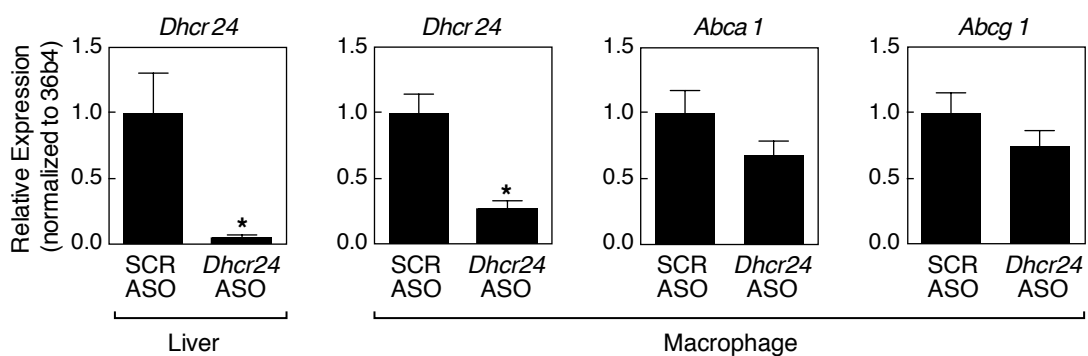**D**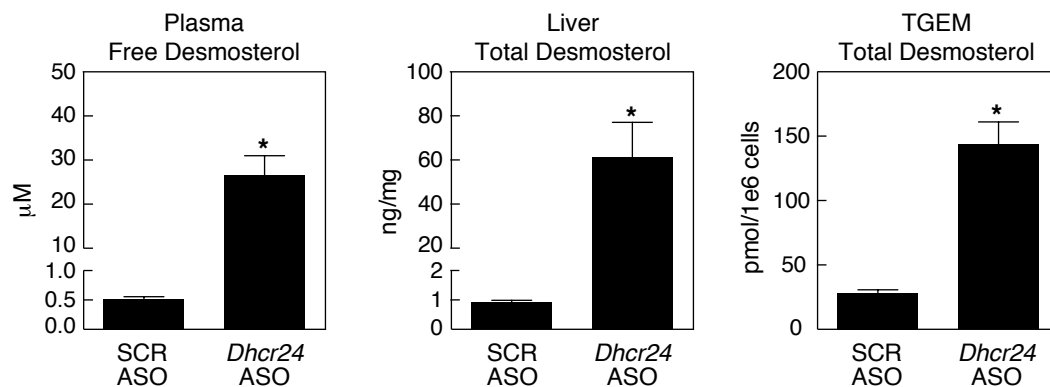

Figure S1

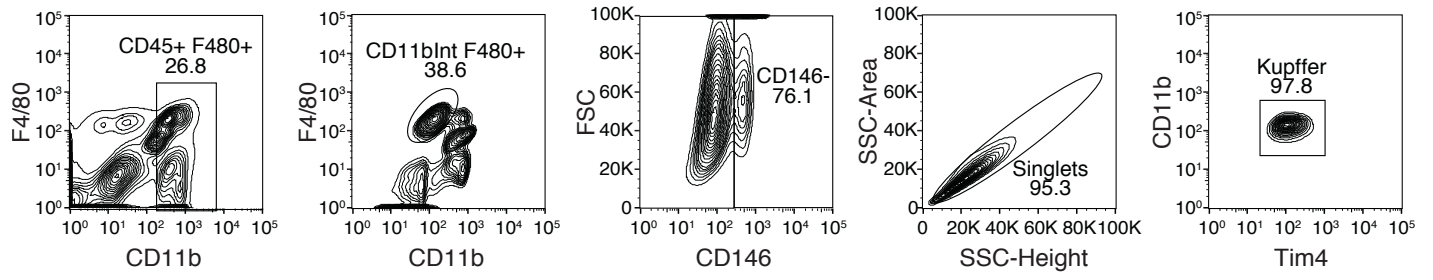

Figure S2
